# Supplementary material
Source: Springer Nature journal article supplement (https://www.springermedizin.de/resource/supplementary/11689_2012_7_MOESM2_ESM.pdf/9673034)

**Random assignment  
to Group 1 vs. 2**

**Social attention measure  
(e.g. ERP, eye-tracking)**

**Outcome**

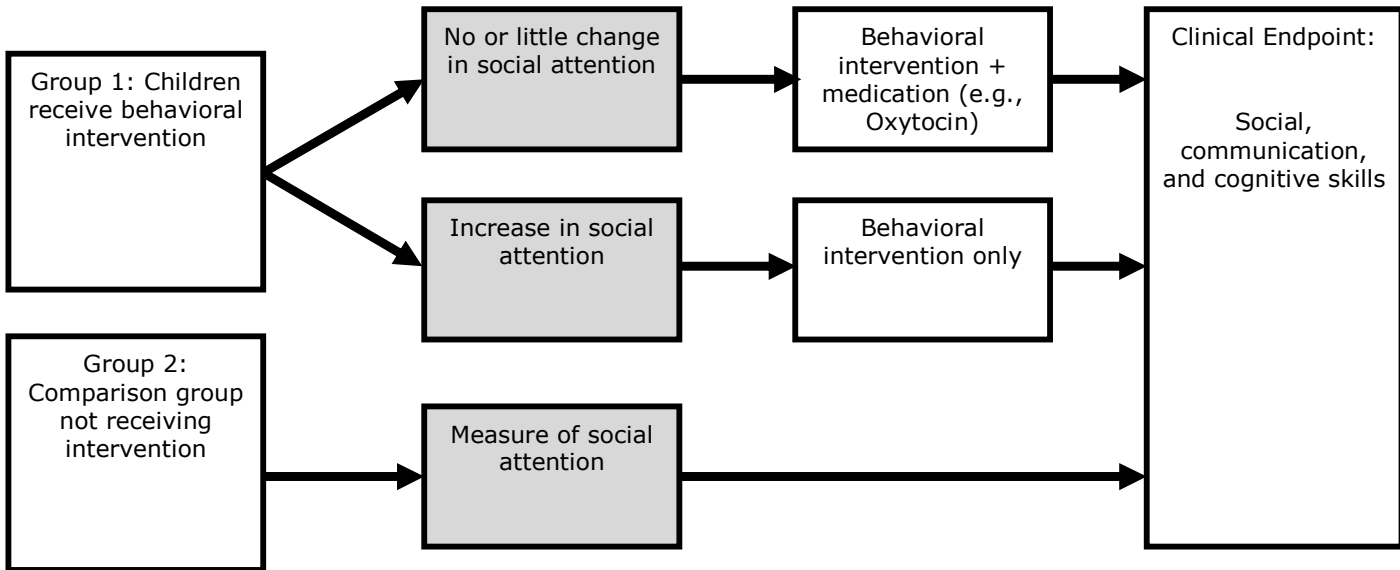

Supplement: MOESM2 [file 9673034]
